# Supplementary material for: Green chemiluminescence from a bis-cyclometalated iridium(iii) complex with an ancillary bathophenanthroline disulfonate ligand
Source: Royal Society of Chemistry journal article supplement (doi:10.1039/c1an15315c), 2011-01-01
Supplement: c1an15315c1.pdf [file c1an15315c1.pdf]

Electronic Supplementary Information for:

**Green chemiluminescence from a bis-cyclometalated iridium complex with an ancillary bathophenanthroline disulfonate ligand**

Elizabeth M. Zammit, Neil W. Barnett, Luke C. Henderson, Gail A. Dyson, Ming Zhou, Paul S. Francis\*

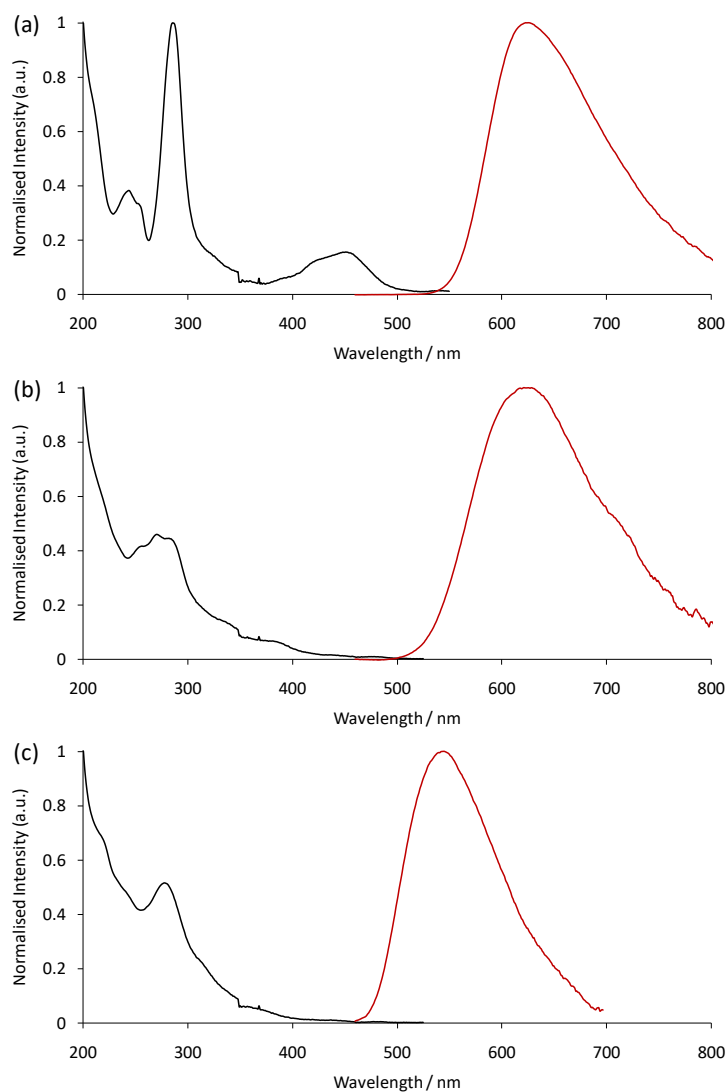

**Fig. S1** Absorption spectra (black lines) and photoluminescence emission spectra (red lines) for (a) [Ru(bipy)<sub>3</sub>]<sup>2+</sup>, (b) [(ppy)<sub>2</sub>Ir(BPS)]<sup>-</sup>, and (c) [(df-ppy)<sub>2</sub>Ir(BPS)]<sup>-</sup>. All complexes at a concentration of  $1 \times 10^{-5}$  M in 1:1 acetonitrile:water. Emission spectra were corrected for the wavelength dependence of the detector response and monochromator transmission.

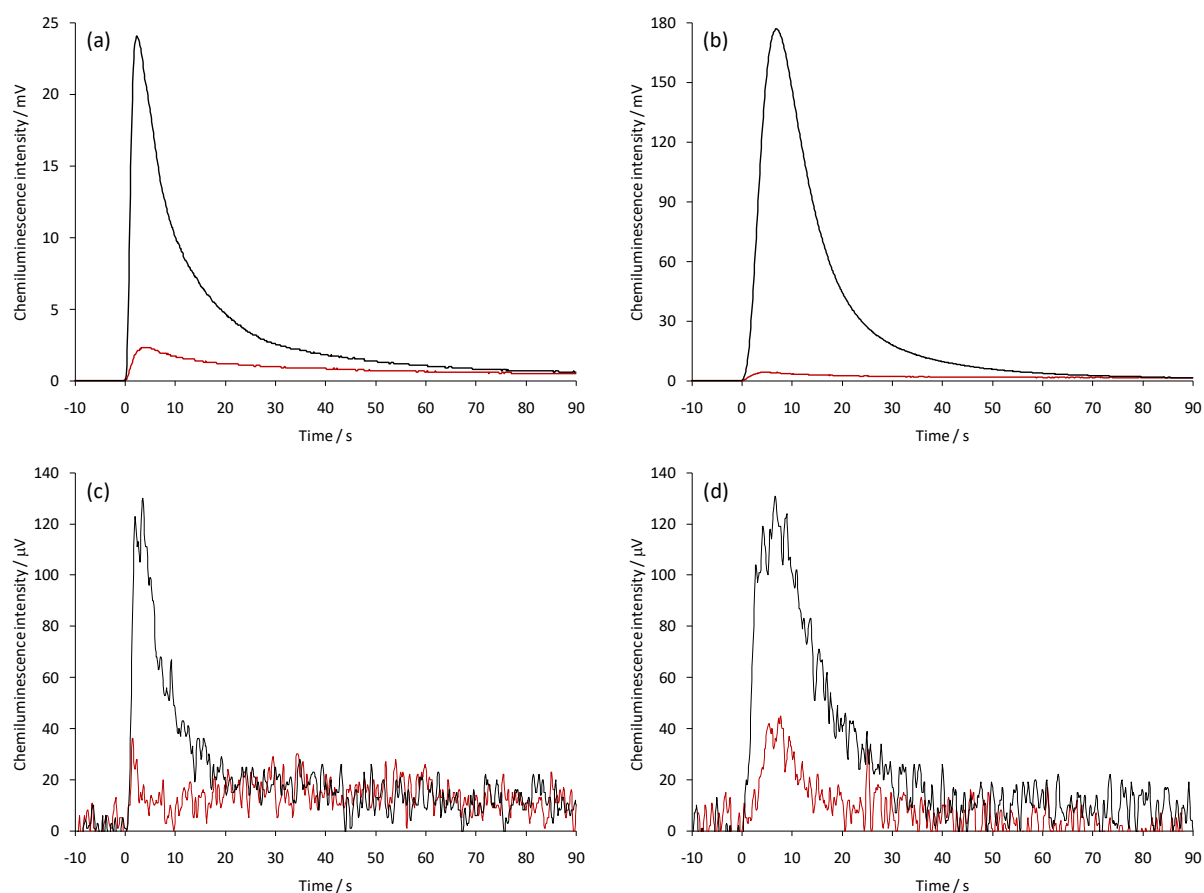

**Fig. S2** Intensity versus time profiles for the chemiluminescence reactions of: (a)  $1 \times 10^{-3}$  M  $[(df-ppy)_2Ir(BPS)]^-$  or (b)  $1 \times 10^{-3}$  M  $[Ru(bipy)_3]^{2+}$ , and  $1 \times 10^{-3}$  M cerium(IV), with (black traces) or without (red traces)  $1 \times 10^{-5}$  M ofloxacin; and (c)  $1 \times 10^{-5}$  M  $[(df-ppy)_2Ir(BPS)]^-$  or (d)  $1 \times 10^{-5}$  M  $[Ru(bipy)_3]^{2+}$ , and  $1 \times 10^{-3}$  M cerium(IV), with (black traces) or without (red traces)  $1 \times 10^{-6}$  M ofloxacin. The intensity of the red trace in figure S2(b) was multiplied by 5 for comparison purposes. The stopped-flow manifold was constructed as previously described (*Anal. Chem.*, 2010, **82**, 2580-2584). Discrepancies in the signal/blank ratios obtained in these experiments and the flow-injection analysis procedure described in the paper arise due to differences in the final reactant concentrations, the mode of mixing and the portion of the emission profile measured. Experimental details: the injection loop (70  $\mu$ L) was filled with reagent and ofloxacin solutions (combined 1:1 (v/v) off-line). The syringe pump was then activated to dispense 120  $\mu$ L of carrier (1:1 acetonitrile:water) and 120  $\mu$ L of oxidant ( $1 \times 10^{-3}$  M cerium(IV) in 0.05 M  $H_2SO_4$ ) solutions at a rate of 10 mL  $min^{-1}$  per line, which rapidly merged the three reactants in a dual-inlet serpentine flow-cell, where the emission was monitored over time.

**Table S1**  $^1\text{H}$  and  $^{13}\text{C}$  NMR chemical shifts (ppm) for  $[(\text{ppy})_2\text{Ir}(\text{BPS})]^-$  and  $[(\text{df-ppy})_2\text{Ir}(\text{BPS})]^-$  in  $\text{CD}_3\text{OD}$ , collected using a Bruker Avance AV400 spectrometer.

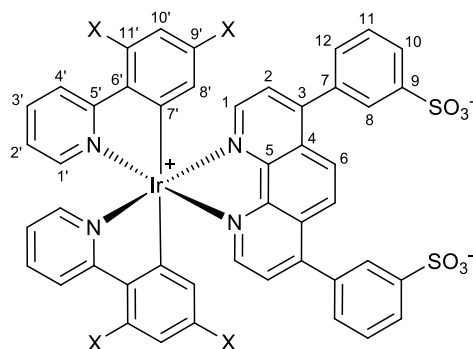

|     | $[(\text{ppy})_2\text{Ir}(\text{BPS})]^-$ (X = H) |                 | $[(\text{df-ppy})_2\text{Ir}(\text{BPS})]^-$ (X = F) |                 |
|-----|---------------------------------------------------|-----------------|------------------------------------------------------|-----------------|
|     | $^1\text{H}$                                      | $^{13}\text{C}$ | $^1\text{H}$                                         | $^{13}\text{C}$ |
| 1'  | 7.60                                              | 150.3           | 7.69                                                 | 150.6           |
| 2'  | 6.94                                              | 124.6           | 7.06                                                 | 125.0           |
| 3'  | 7.82                                              | 139.6           | 7.93                                                 | 140.8           |
| 4'  | 8.15                                              | 121.0           | 8.39                                                 | 125.0           |
| 5'  | -                                                 | 169.3           | -                                                    | 165.4           |
| 6'  | -                                                 | 145.5           | -                                                    | 128.7           |
| 7'  | -                                                 | 151.5           | -                                                    | 166.2           |
| 8'  | 6.41                                              | 133.0           | 5.86                                                 | 115.2           |
| 9'  | 6.89                                              | 131.5           | -                                                    | 164.0           |
| 10' | 7.00                                              | 123.9           | 6.72                                                 | 101.1           |
| 11' | 7.84                                              | 126.1           | -                                                    | 161.9           |
| 1   | 8.42                                              | 152.0           | 8.47                                                 | 152.2           |
| 2   | 7.82                                              | 128.3           | 7.95                                                 | 128.7           |
| 3   | -                                                 | 148.7           | -                                                    | 148.4           |
| 4   | -                                                 | 130.8           | -                                                    | 130.8           |
| 5   | -                                                 | 151.5           | -                                                    | 152.0           |
| 6   | 8.25                                              | 127.5           | 8.25                                                 | 127.6           |
| 7   | -                                                 | 137.2           | -                                                    | 137.0           |
| 8   | 8.06                                              | 128.2           | 8.08                                                 | 128.3           |
| 9   | -                                                 | 147.5           | -                                                    | 147.4           |
| 10  | 8.03                                              | 128.3           | 8.02                                                 | 128.0           |
| 11  | 7.69                                              | 132.7           | 7.68                                                 | 130.4           |
| 12' | 7.66                                              | 130.3           | 7.74                                                 | 132.7           |
